# Supplementary material for: A case report of superior vena cava/right coronary artery fistula secondary to chronic endocarditis
Source: PubMed Central journal article supplement — Eur Heart J Case Rep. 2024 May 15;8(5):ytae240. doi: 10.1093/ehjcr/ytae240 (PMC11104665; doi:10.1093/ehjcr/ytae240), 2024-05-15
Supplement: ytae240_supplementary_data.pdf [file ytae240_supplementary_data.pdf]

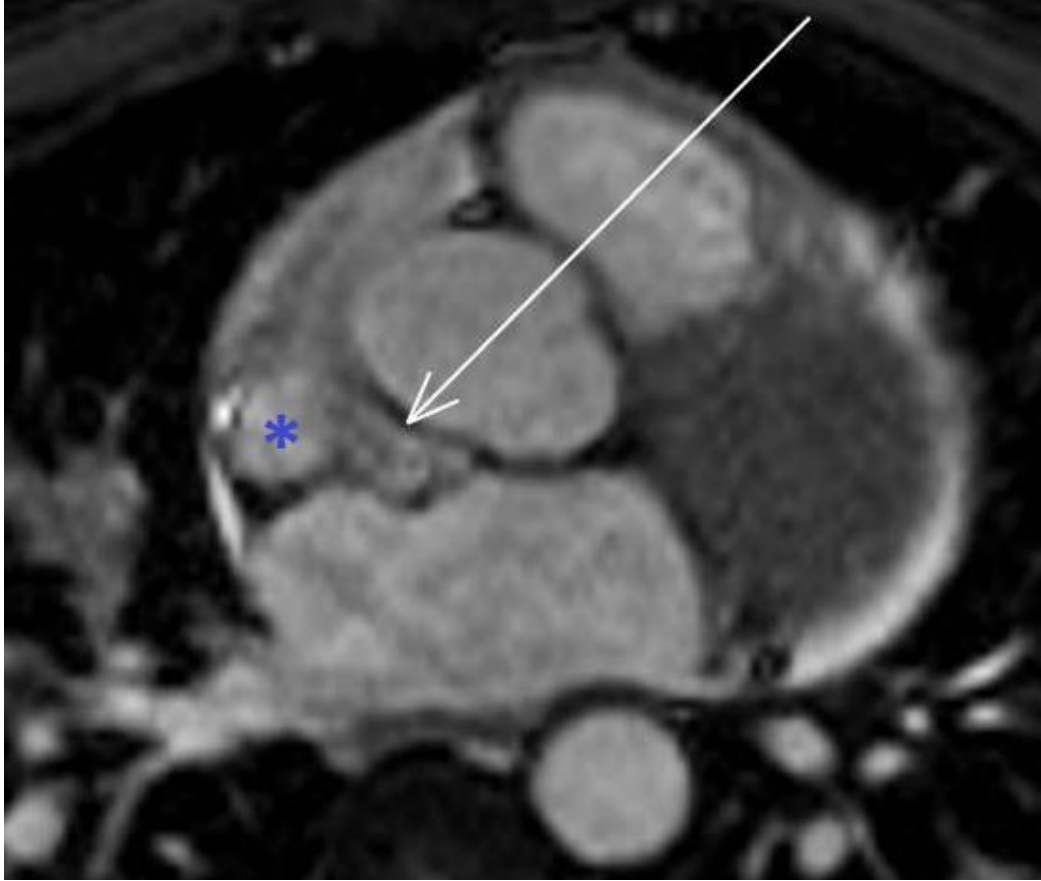

**Supplemental Figure 1: RCA/SVC coronary fistula via cardiac MRI, axial.** An axial slice from cardiac MRI showing the SVC (blue asterisk) and an abnormal connection (arrow).

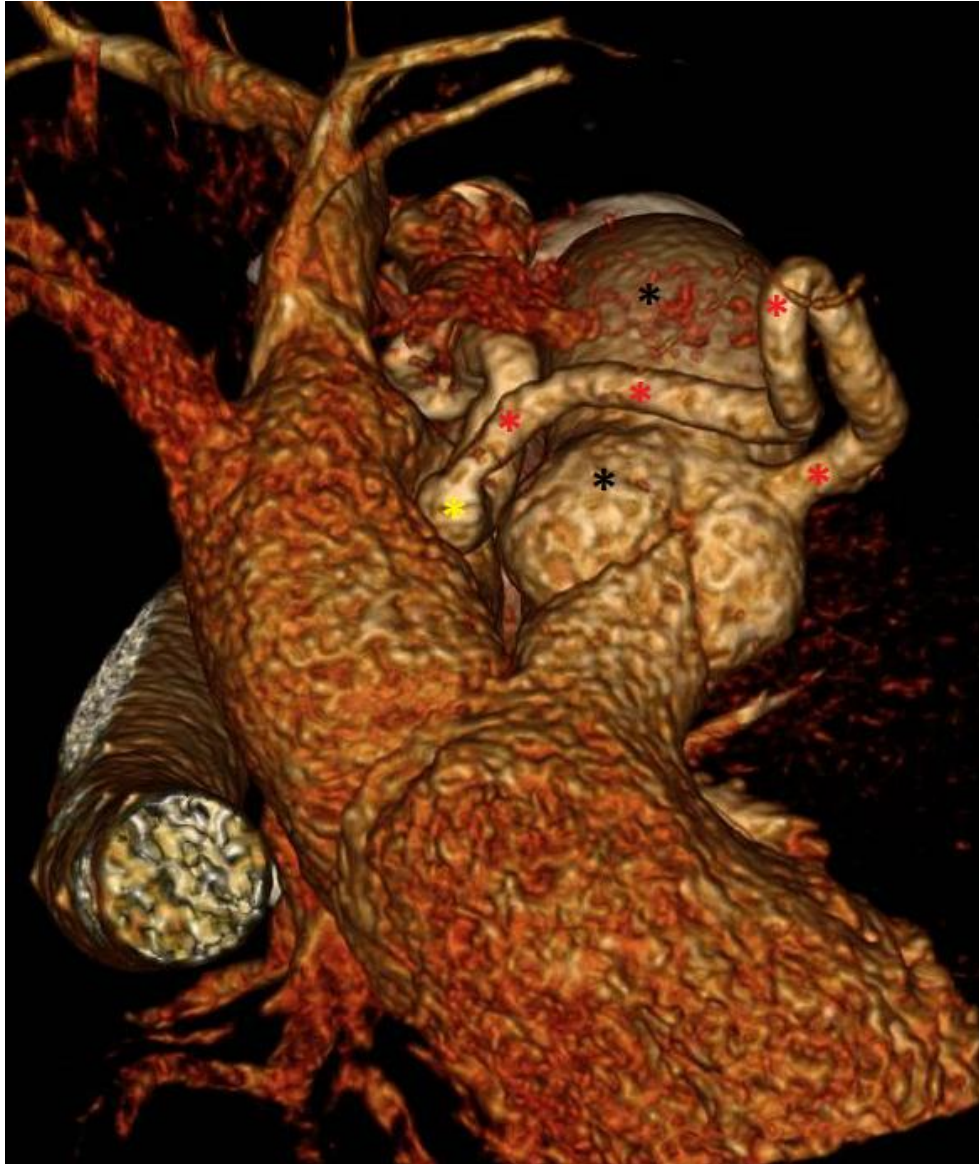

**Supplemental Figure 2: EKG gated CTA chest, cranial view.** Another 3D reconstruction from the EKG gated CTA showing an abnormal RCA-SVC connection (yellow asterisk) via a fistula (red asterix). The aorta (black asterix) is also visualized with its root.
